# Supplementary material for: Research Trends and Methodological Approaches of the Impacts of Windstorms on Forests in Tropical, Subtropical, and Temperate Zones: Where Are We Now and How Should Research Move Forward?
Source: MDPI journal article supplement (doi:10.3390/plants9121709), 2020-12-04
Supplement: s1 [file s1]

## Supplementary Materials

**Table S1.** Sample main matrix used in data categorization. The subsequent data categorization and analysis was based on this main matrix.

| Sequence No. | File Name | Journal name | Forest type (TRF, SUF, TEF) | Study site | Coordinates |      | Windstorm | Study duration |     | Major effect |    |    |   | Methodological approaches (observational or controlled) | Type of plot (permanent or temporary) | Other notes |
|--------------|-----------|--------------|-----------------------------|------------|-------------|------|-----------|----------------|-----|--------------|----|----|---|---------------------------------------------------------|---------------------------------------|-------------|
|              |           |              |                             |            | LAT         | LONG |           | Start          | End | MCI          | SP | CE | L |                                                         |                                       |             |
|              |           |              |                             |            |             |      |           |                |     |              |    |    |   |                                                         |                                       |             |
|              |           |              |                             |            |             |      |           |                |     |              |    |    |   |                                                         |                                       |             |
|              |           |              |                             |            |             |      |           |                |     |              |    |    |   |                                                         |                                       |             |
|              |           |              |                             |            |             |      |           |                |     |              |    |    |   |                                                         |                                       |             |
|              |           |              |                             |            |             |      |           |                |     |              |    |    |   |                                                         |                                       |             |

Abbreviations: LAT- Latitude; LONG- Longitude; MCI-molecular, cellular, individual level; SP-Species, population level; CE- community, ecosystem level.
